# Supplementary material
Source: PubMed Central journal article supplement (PMC5001845)
Supplement: NIHMS811071-supplement-Supplemental_table.pdf [file NIHMS811071-supplement-Supplemental_table.pdf]

**Supplementary Table 1: Prevalence of IBS per country**

| Country             | References of studies           | Total sample   | Total IBS     | Prevalence (%) |
|---------------------|---------------------------------|----------------|---------------|----------------|
| Canada              | 51,79                           | 1,586          | 249           | 15.7           |
| USA                 | 5,24,54,70,74,75,76,84,         | 51,204         | 3,308         | 6.46           |
| Mexico              | 52                              | 500            | 80            | 40.0           |
| Colombia            | 27                              | 558            | 111           | 19.9           |
| Peru                | 15,21                           | 531            | 129           | 24.2           |
| Chile               | 55                              | 437            | 125           | 28.6           |
| Brazil              | 72                              | 183            | 31            | 16.9           |
| Argentina           | 62                              | 831            | 100           | 12.0           |
| Uruguay             | 37                              | 266            | 29            | 10.9           |
| Iceland             | 61                              | 1,336          | 413           | 30.9           |
| Norway              | 81                              | 4,622          | 388           | 8.4            |
| Finland             | 32                              | 3,631          | 184           | 5.1            |
| Sweden              | 2,3,6,63,82                     | 7,350          | 1,195         | 16.3           |
| Denmark             | 68                              | 47,174         | 4,939         | 10.5           |
| UK                  | 1,30,41,43,59,85                | 19,885         | 2,530         | 12.7           |
| Netherlands         | 10                              | 428            | 25            | 5.8            |
| Germany             | 31,34,38                        | 3,889          | 246           | 6.3            |
| France              | 11,12,23                        | 34,472         | 1,245         | 3.6            |
| Italy               | 20,80,88                        | 32,072         | 2,503         | 7.8            |
| Spain               | 14,58                           | 2,420          | 317           | 13.1           |
| Greece              | 65                              | 700            | 150           | 21.4           |
| Croatia             | 8,26                            | 1,203          | 346           | 28.7           |
| Romania             | 25                              | 338            | 49            | 14.5           |
| Russia              | 69                              | 1040           | 198           | 19.0           |
| Turkey              | 9,16,42,87,                     | 6,473          | 671           | 10.4           |
| Israel              | 73                              | 981            | 112           | 11.4           |
| Iran                | 4,44,45                         | 24,920         | 750           | 3.1            |
| India               | 56                              | 4,767          | 191           | 4.0            |
| Pakistan            | 36,39                           | 1,928          | 589           | 30.5           |
| Bangladesh          | 57,66                           | 3,929          | 322           | 8.2            |
| Thailand            | 22                              | 401            | 50            | 5.7            |
| Singapore           | 17,28,33                        | 3,243          | 222           | 6.8            |
| Malaysia            | 67                              | 949            | 148           | 15.6           |
| Hongkong            | 47,48                           | 2,298          | 114           | 4.9            |
| Mainland China      | 18,49,64,83,86,89               | 29,288         | 1,341         | 4.6            |
| Taiwan              | 53                              | 2,018          | 447           | 22.1           |
| Japan               | 35,46                           | 15,020         | 1,789         | 11.9           |
| South Korea         | 19,29,40,50                     | 4,346          | 274           | 6.3            |
|                     |                                 |                |               |                |
| Australia           | 13,77,78                        | 3,739          | 308           | 8.2            |
| New Zealand         | 7                               | 980            | 184           | 18.8           |
| Nigeria             | 60                              | 443            | 140           | 31.6           |
| South Africa        | 71                              | 332            | 27            | 8.1            |
| <b>42 countries</b> | <b>total No. of studies: 89</b> | <b>322,271</b> | <b>26,569</b> | <b>8.23</b>    |

1. Aggarwal VR, McBeth J, Zakrzewska JM, et al. The epidemiology of chronic syndromes that are frequently unexplained: do they have common associated factors? *Int J Epidemiol* 2006;35:468–476.
2. Agréus L, Svärdsudd K, Nyrén O, et al. Irritable bowel syndrome and dyspepsia in the general population: overlap and lack of stability over time. *Gastroenterology* 1995;109:671–680.
3. Agréus L, Talley NJ, Svärdsudd K, et al. Identifying dyspepsia and irritable bowel syndrome: the value of pain or discomfort, and bowel habit descriptors. *Scand J Gastroenterol* 2000;35:142–151.
4. Amra B, Hoseini-Asl MK, Rahmani AR, et al. Correlation between asthma and irritable bowel syndrome in a general population in Iran in 2003. *Respir Med* 2006;100:110–114.
5. Andrews EB, Eaton SC, Hollis KA, et al. Prevalence and demographics of irritable bowel syndrome: results from a large webbased survey. *Aliment Pharmacol Ther* 2005;22:935–942.
6. Aro P, Ronkainen J, Storskrubb T, et al. Valid symptom reporting at upper endoscopy in a random sample of the Swedish adult general population: the Kalixanda study. *Scand J Gastroenterol* 2004;39:1280–1288.
7. Barbezat G, Poulton R, Milne B, Howell S, Fawcett JP, Talley N. Prevalence and correlates of irritable bowel symptoms in a New Zealand birth cohort. *N Z Med J.* 2002 Oct 25;115(1164):U220.
8. Baretic M, Bilic A, Jurcic D, et al. Epidemiology of irritable bowel syndrome in Croatia. *Coll Antropol* 2002;26(Suppl):85–91.
9. Basaranoglu M, Celebi S, Ataseven H, et al. Prevalence and consultation behavior of self-reported rectal bleeding by faceto-face interview in an Asian community. *Digestion* 2008;77:10–15.
10. Boekema PJ, van Dam van Isselt EF, Bots ML, et al. Functional bowel symptoms in a general Dutch population and associations with a common stimulus. *Neth J Med* 2001;59:23–30.
11. Bommelaer G, Dorval E, Denis P, et al. Prevalence of irritable bowel syndrome in the French population according to the Rome I criteria. *Gastroenterol Clin Biol* 2002;26:1118–1123.
12. Bommelaer G, Poynard T, Le Pen C, et al. Prevalence of irritable bowel syndrome (IBS) and variability of diagnostic criteria. *Gastroenterol Clin Biol* 2004;28:554–561.
13. Boyce PM, Koloski NA, Talley NJ. Irritable bowel syndrome according to varying diagnostic criteria: are the new Rome II criteria unnecessarily restrictive for research and practice? *Am J Gastroenterol* 2000;95:3176–3183.
14. Caballero-Plasencia AM, Sofos-Kontoyannis S, Valenzuela-Barranco M, et al. Irritable bowel syndrome in patients with dyspepsia: a community-based study in Southern Europe. *Eur J Gastroenterol Hepatol* 1999;11:517–522.
15. Campos Hurtado G, León Barúa R, Villareal Menchola J, et al. [Association between irritable intestinal syndrome and depressive symptoms in a population of high socioeconomic level of Lima]. *Rev Gastroenterol Peru* 2001;21:198–204.
16. Celebi S, Acik Y, Deveci SE, et al. Epidemiological features of irritable bowel syndrome in a Turkish urban society. *J Gastroenterol Hepatol* 2004;19:738–743.
17. Chen LY, Ho KY, Phua KH. Normal bowel habits and prevalence of functional bowel disorders in Singaporean adults: findings from a community based study in Bishan. *Singapore Med J* 2000;41:255–258.
18. Cheung TK, Lam KF, Hu WH, et al. Positive association between gastro-oesophageal reflux disease and irritable bowel syndrome in a Chinese population. *Aliment Pharmacol Ther* 2007;25: 1099–1104.
19. Choo KY, Choi MG, Choi H, et al. [The prevalence of gastrointestinal symptoms in a rural community in Korea]. *Korean J Gastrointest Motil* 2000;6:31–43.
20. Corazziari E, Attili AF, Angeletti C, et al. Gallstones, cholecystectomy and irritable bowel syndrome (IBS): MICOL populationbased study. *Dig Liver Dis* 2008;40:944–950.
21. Curioso WH, Mendoza ND, Zerpa CB, et al. [Prevalence and relation of dyspepsia to irritable bowel syndrome in a native community of the Peruvian jungle]. *Rev Gastroenterol Peru* 2002;22:129–140.

22. Danivat M, Tankeyoon M, Sriratanaban A. Prevalence of irritable bowel syndrome in a non-Western population. *BMJ* 1988;296:1710.
23. Dapoigny M, Bellanger J, Bonaz B, et al. Irritable bowel syndrome in France: a common, debilitating and costly disorder. *Eur J Gastroenterol Hepatol* 2004;16:995–1001.
24. Drossman DA, Li Z, Andruzzi E, et al. U.S. householder survey of functional gastrointestinal disorders: prevalence, sociodemography, and health impact. *Dig Dis Sci* 1993;38:1569–1580.
25. Drug VL, Oprea L, Bunescu D, et al. The epidemiology of irritable bowel syndrome in an urban general population. *Rom J Gastroenterol* 2000;9:83–86.
26. Ebling B, Jurcic' D, Gmajnic' R, et al. Anthropological, demographic, and socioeconomic characteristics of irritable bowel syndrome. *Coll Antropol* 2011;35:513–521.
27. Gómez Alvarez DF, Morales Vargas JG, Rojas Medina LM, et al. [Prevalence of irritable bowel syndrome and associated factors according to the Rome III diagnostic criteria in a general population in Colombia]. *Gastroenterol Hepatol* 2009;32:395–400.
28. Gwee KA, Wee S, Wong ML, et al. The prevalence, symptom characteristics, and impact of irritable bowel syndrome in an Asian urban community. *Am J Gastroenterol* 2004;99:924–931.
29. Han SH, Lee OY, Bae SC, et al. Prevalence of irritable bowel syndrome in Korea: population-based survey using the Rome II criteria. *J Gastroenterol Hepatol* 2006;21:1687–1692.
30. Heaton KW, O'Donnell LJ, Braddon FE, et al. Symptoms of irritable bowel syndrome in a British urban community: consulters and non-consulters. *Gastroenterology* 1992;102:1962–1967.
31. Herschbach P, Henrich G, von Rad M. Psychological factors in functional gastrointestinal disorders: characteristics of the disorder or the illness behavior? *Psychosom Med* 1999;61:148–153.
32. Hillilä MT, Färkkilä MA. Prevalence of irritable bowel syndrome according to different diagnostic criteria in a non-selected adult population. *Aliment Pharmacol Ther* 2004;20:339–345.
33. Ho KY, Kang JY, Seow A. Prevalence of gastrointestinal symptoms in a multiracial Asian population, with particular reference to reflux-type symptoms. *Am J Gastroenterol* 1998;93:1816–1822.
34. Holtmann G, Goebell H, Talley NJ. Dyspepsia in consulters and non-consulters: prevalence, health-care seeking behaviour and risk factors. *Eur J Gastroenterol Hepatol* 1994;6:917–924.
35. Hongo M. Epidemiology of FGID symptoms in Japanese general population with reference to life style. *J Gastroenterol Hepatol* 2011;26(Suppl 3):19–22.
36. Husain N, Chaudhry IB, Jafri F, et al. A population-based study of irritable bowel syndrome in a non-Western population. *Neurogastroenterol Motil* 2008;20:1022–1029.
37. Iade B, Toma R. [The frequency of irritable bowel syndrome in a population of Montevideo]. *Arch Med Int* 2003;25:91-96
38. Icks A, Haastert B, Enck P, et al. Prevalence of functional bowel disorders and related health care seeking: a population-based study. *Z Gastroenterol* 2002;40:177–183.
39. Jafri W, Yakoob J, Jafri N, et al. Irritable bowel syndrome and health seeking behaviour in different communities of Pakistan. *J Pak Med Assoc* 2007;57:285–287.
40. Jeong JJ, Choi MG, Cho YS, et al. Chronic gastrointestinal symptoms and quality of life in the Korean population. *World J Gastroenterol* 2008;14:6388–6394.
41. Jones R, Lydeard S. Irritable bowel syndrome in the general population. *BMJ* 1992;304:87–90.
42. Karaman N, Türkay C, Yönm O. Irritable bowel syndrome prevalence in city center of Sivas. *Turk J Gastroenterol* 2003;14: 128–131.
43. Kennedy TM, Jones RH, Hungin AP, et al. Irritable bowel syndrome, gastro-oesophageal reflux, and bronchial hyper-responsiveness in the general population. *Gut* 1998;43:770–774.

44. Khademolhosseini F, Mehrabani D, Nejabat M, et al. Irritable bowel syndrome in adults over 35 years in Shiraz, southern Iran: prevalence and associated factors. *J Res Med Sci* 2011;16:200–206.
45. Khoshkrood-Mansoori B, Pourhoseingholi MA, Safaei A, et al. Irritable bowel syndrome: a population based study. *J Gastrointest Liver Dis* 2009;18:413–418.
46. Kumano H, Kaiya H, Yoshiuchi K, et al. Comorbidity of irritable bowel syndrome, panic disorder, and agoraphobia in a Japanese representative sample. *Am J Gastroenterol* 2004;99:370–376.
47. Kwan AC, Hu WH, Chan YK, et al. Prevalence of irritable bowel syndrome in Hong Kong. *J Gastroenterol Hepatol* 2002;17:1180–1186.
48. Lau EM, Chan FK, Ziea ET, et al. Epidemiology of irritable bowel syndrome in Chinese. *Dig Dis Sci* 2002;47:2621–2624.
49. Lee S, Wu J, Ma YL, et al. Irritable bowel syndrome is strongly associated with generalized anxiety disorder: a community study. *Aliment Pharmacol Ther* 2009;30:643–651.
50. Lee SY, Lee KJ, Kim SJ, et al. Prevalence and risk factors for overlaps between gastroesophageal reflux disease, dyspepsia, and irritable bowel syndrome: a population-based study. *Digestion* 2009;79:196–201.
51. Li FX, Patten SB, Hilsden RJ, et al. Irritable bowel syndrome and health-related quality of life: a population-based study in Calgary, Alberta. *Can J Gastroenterol* 2003;17:259–263.
52. López-Colombo A, Morgan D, Bravo-González D, Montiel-Jarquín A, Méndez-Martínez S, Schmulson M. The epidemiology of functional gastrointestinal disorders in Mexico: a population-based study. *Gastroenterol Res Pract.* 2012;2012:606174.
53. Lu CL, Chen CY, Lang HC, Luo JC, Wang SS, Chang FY, Lee SD. Current patterns of irritable bowel syndrome in Taiwan: the Rome II questionnaire on a Chinese population. *Aliment Pharmacol Ther.* 2003 Dec;18(11-12):1159-69
54. Lydiard RB, Greenwald S, Weissman MM, et al. Panic disorder and gastrointestinal symptoms: findings from the NIMH epidemiologic catchment area project. *Am J Psychiatry* 1994;151:64–70.
55. Madrid-Silva AM, Defilippi-Caffri C, Landskron-Ramos G, Olgún-Herrera F, Reyes-Ponce A, Castro-Lara A, Larrain-Corp S, Martínez-Roje N, Cortés-Espinoza J. [The prevalence of irritable bowel symptoms in a population of shopping mall visitors in Santiago de Chile]. *Rev Gastroenterol Mex.* 2013 Oct-Dec;78(4):203-10.
56. Makharia GK, Verma AK, Amarchand R, Goswami A, Singh P, Agnihotri A, Suhail F, Krishnan A. Prevalence of irritable bowel syndrome: a community based study from northern India. *J Neurogastroenterol Motil.* 2011 Jan;17(1):82-7.
57. Masud MA, Hasan M, Khan AK. Irritable bowel syndrome in a rural community in Bangladesh: prevalence, symptom pattern, and health care seeking behavior. *Am J Gastroenterol* 2001;96:1547–1552.
58. Mearin F, Badía X, Balboa A, et al. Irritable bowel syndrome prevalence varies enormously depending on the employed diagnostic criteria: comparison of Rome II versus previous criteria in a general population. *Scand J Gastroenterol* 2001;36:1155–1161.
59. Nicholl BI, Halder SL, MacFarlane GJ, et al. Psychosocial risk markers for new onset irritable bowel syndrome: results of a large prospective population-based study. *Pain* 2008;137:147–155.
60. Okeke EN, Ladep NG, Adah S, et al. Prevalence of irritable bowel syndrome: a community survey in an African population. *Ann Afr Med* 2009;8:177–180.
61. Olafsdóttir LB, Gudjónsson H, Thjódleifsson B. [Epidemiological study of functional bowel disorders in Iceland]. *Laeknabladid* 2005;91:329–333.
62. Olmos JA, Guzmán M, Gadea O, et al. Irritable bowel syndrome: prevalence, comorbidity and impact. A population based study. *Gut.* 2010;59, supplement 3:p. A361

63. Osterberg E, Blomquist L, Krakau I, et al. A population study on irritable bowel syndrome and mental health. *Scand J Gastroenterol* 2000;35:264–268.
64. Pan G, Lu S, Ke M, et al. Epidemiologic study of the irritable bowel syndrome in Beijing: stratified
65. Papatheoridis GV, Karamanolis DG. Prevalence and impact of upper and lower gastrointestinal symptoms in the Greek urban general population. *Scand J Gastroenterol* 2005;40:412–421.
66. Perveen I, Hasan M, Masud MA, et al. Irritable bowel syndrome in a Bangladeshi urban community: prevalence and health care seeking pattern. *Saudi J Gastroenterol* 2009;15:239–243.
67. Rajendra S, Alahuddin S. Prevalence of irritable bowel syndrome in a multi-ethnic Asian population. *Aliment Pharmacol Ther* 2004;19:707–708.
68. Rasmussen S, Jensen TH, Henriksen SL, Haastrup PF, Larsen PV, Søndergaard J, Jarbøl DE. Overlap of symptoms of gastroesophageal reflux disease, dyspepsia and irritable bowel syndrome in the general population. *Scand J Gastroenterol*. 2015 Feb;50(2):162-9.
69. Reshetnikov OV, Kurilovich SA, Bobak M, et al. [Gastrointestinal symptoms in adult population of Novosibirsk city: prevalence and risk factors]. *Ter Arkh* 2009;81:11–16.
70. Saito YA, Locke GR, Talley NJ, et al. A comparison of the Rome and Manning criteria for case identification in epidemiological investigations of irritable bowel syndrome. *Am J Gastroenterol* 2000;95:2816–2824.
71. Segal I. The irritable bowel syndrome in the black community. *S Afr Med J* 1984;65:73–74.
72. Soares RL, dos Santos JM, Rocha VR. Prevalence of irritable bowel syndrome in a Brazilian Amazon community. *Neurogastroenterol Motil* 2005;17:883.
73. Sperber AD, Shvartzman P, Friger M, et al. A comparative reappraisal of the Rome II and Rome III diagnostic criteria: are we getting closer to the “true” prevalence of irritable bowel syndrome? *Eur J Gastroenterol Hepatol* 2007;19:441–447.
74. Talley NJ, Weaver AL, Zinsmeister AR, et al. Onset and disappearance of gastrointestinal symptoms and functional gastrointestinal disorders. *Am J Epidemiol* 1992;136:165–177.
75. Talley NJ, Fett SL, Zinsmeister AR, et al. Gastrointestinal tract symptoms and self-reported abuse: a population-based study. *Gastroenterology* 1994;107:1040–1049.
76. Talley NJ, Zinsmeister AR, Melton LJ III. Irritable bowel syndrome in a community: symptom subgroups, risk factors, and health care utilization. *Am J Epidemiol* 1995;142:76–83.
77. Talley NJ, Boyce PM, Owen BK, et al. Initial validation of a bowel symptom questionnaire and measurement of chronic gastrointestinal symptoms in Australians. *Aust N Z J Med* 1995;25:302–308.
78. Talley NJ, Boyce PM, Jones M. Predictors of health care seeking for irritable bowel syndrome: a population based study. *Gut* 1997;41:394–398.
79. Thompson WG, Irvine EJ, Pare P, et al. Functional gastrointestinal disorders in Canada: first population-based survey using Rome II criteria with suggestions for improving the questionnaire. *Dig Dis Sci* 2002;47:225–235.
80. Usai P, Manca R, Lai MA, et al. Prevalence of irritable bowel syndrome in Italian rural and urban areas. *Eur J Intern Med* 2010;21:324–326.
81. Vandvik PO, Lydersen S, Farup PG. Prevalence, comorbidity and impact of irritable bowel syndrome in Norway. *Scand J Gastroenterol*. 2006 Jun;41(6):650-6.
82. Walter SA, Kjellström L, Nyhlin H, et al. Assessment of normal bowel habits in the general adult population: the Popcol study. *Scand J Gastroenterol* 2010;45:556–566.
83. Wei X, Chen M, Wang J. [The epidemiology of irritable bowel syndrome and functional constipation of Guangzhou residents]. *Chin J Intern Med* 2001;40:517–520.

84. Whitehead WE, Winget C, Fedoravicius AS, et al. Learned illness behavior in patients with irritable bowel syndrome and peptic ulcer. *Dig Dis Sci* 1982;27:202–208.
85. Wilson S, Roberts L, Roalfe A, et al. Prevalence of irritable bowel syndrome: a community survey. *Br J Gen Pract* 2004;54:495–502.
86. Xiong LS, Chen MH, Chen HX, et al. A population-based epidemiologic study of irritable bowel syndrome in South China: stratified randomized study by cluster sampling. *Aliment Pharmacol Ther* 2004;19:1217–1224.
87. Yilmaz S, Dursun M, Ertem M, et al. The epidemiological aspects of irritable bowel syndrome in southeastern Anatolia: a stratified randomised community-based study. *Int J Clin Pract* 2005;59:361–369.
88. Zagari RM, Law GR, Fuccio L, et al. Epidemiology of functional dyspepsia and subgroups in the Italian general population: an endoscopic study. *Gastroenterology* 2010;138:1302–1311.
89. Zhao Y, Zou D, Wang R, et al. Dyspepsia and irritable bowel syndrome in China: a population-based endoscopy study of prevalence and impact. *Aliment Pharmacol Ther* 2010;32:562–572.
